# Supplementary material for: Spastin mutations impair coordination between lipid droplet dispersion and reticulum
Source: PubMed Central journal article supplement (PMC7173978; doi:10.1371/journal.pgen.1008665), 2020-04-21
Supplement: pgen.1008665.s005.pdf [file pgen.1008665.s005.pdf]

Table S1

A

|                         |          | Brain  |       |        |       | Muscle |       |                    |       | Respective Student t test P value |                       |
|-------------------------|----------|--------|-------|--------|-------|--------|-------|--------------------|-------|-----------------------------------|-----------------------|
|                         |          | Ctrl   |       | Spa-/- |       | Ctrl   |       | Spa-/-             |       | Brain Ctrl vs Spa-/-              | Muscle Ctrl vs Spa-/- |
|                         |          | Mean   | SEM   | Mean   | SEM   | Mean   | SEM   | Mean               | SEM   |                                   |                       |
| SAFA                    | C16:0    | 7.218  | 0.794 | 6.832  | 1.031 | 1.314  | 0.098 | 0.857*             | 0.089 | 0.782                             | 0.026                 |
|                         | C18:0    | 7.689  | 0.472 | 7.720  | 0.297 | 0.627  | 0.095 | 0.604              | 0.017 | 0.958                             | 0.829                 |
|                         | C20:0    |        |       |        |       | 0.024  | 0.007 | 0.025              | 0.002 |                                   | 0.901                 |
|                         | C24:0    | 0.971  | 0.027 | 0.992  | 0.076 |        |       |                    |       | 0.810                             |                       |
| MUFA                    | C16:1ω9  | 0.929  | 0.127 | 0.940  | 0.042 | 0.029  | 0.002 | 0.016 <sup>#</sup> | 0.005 | 0.941                             | 0.068                 |
|                         | C16:1ω7  | 0.472  | 0.080 | 0.430  | 0.063 | 0.038  | 0.003 | 0.021 <sup>#</sup> | 0.006 | 0.700                             | 0.053                 |
|                         | C18:1ω9c | 10.805 | 0.968 | 10.913 | 0.552 | 0.531  | 0.055 | 0.419              | 0.015 | 0.927                             | 0.122                 |
|                         | C18:1ω9t | 0.406  | 0.130 | 0.670  | 0.024 | 0.108  | 0.022 | 0.106              | 0.001 | 0.117                             | 0.943                 |
|                         | C20:1ω9  |        |       |        |       | 0.143  | 0.033 | 0.161              | 0.013 |                                   | 0.632                 |
|                         | C24:1ω9  | 0.572  | 0.074 | 0.595  | 0.062 | 0.179  | 0.036 | 0.170              | 0.025 | 0.822                             | 0.841                 |
| PUFA                    | C16:2ω4  | 0.581  | 0.038 | 0.939  | 0.205 | 0.158  | 0.002 | 0.048*             | 0.017 | 0.161                             | 0.003                 |
|                         | C16:3    | 29.687 | 2.609 | 36.370 | 2.235 | 0.304  | 0.017 | 0.149*             | 0.024 | 0.124                             | 0.006                 |
|                         | C18:2ω6  | 1.606  | 0.150 | 1.861  | 0.042 | 0.522  | 0.095 | 0.515              | 0.016 | 0.176                             | 0.941                 |
|                         | C18:3ω6  | 0.407  | 0.056 | 0.396  | 0.019 | 0.023  | 0.005 | 0.019              | 0.003 | 0.863                             | 0.553                 |
|                         | C18:3ω3  | 1.338  | 0.305 | 2.010  | 0.143 | 0.036  | 0.004 | 0.030              | 0.002 | 0.116                             | 0.316                 |
|                         | C20:2ω6  | 0.197  | 0.063 | 0.214  | 0.021 | 0.026  | 0.006 | 0.021              | 0.001 | 0.802                             | 0.405                 |
|                         | C20:3ω6  | 0.140  | 0.021 | 0.154  | 0.026 | 0.012  | 0.006 | 0.007              | 0.000 | 0.708                             | 0.446                 |
|                         | C20:4ω6  | 2.555  | 0.184 | 2.606  | 0.160 | 0.121  | 0.021 | 0.110              | 0.001 | 0.843                             | 0.611                 |
|                         | C20:5ω3  | 1.977  | 0.441 | 1.652  | 0.142 | 0.215  | 0.036 | 0.200              | 0.001 | 0.522                             | 0.700                 |
|                         | C22:4ω6  | 0.618  | 0.096 | 0.640  | 0.021 | 0.043  | 0.012 | 0.028              | 0.003 | 0.833                             | 0.261                 |
|                         | C22:5ω3  | 0.463  | 0.014 | 0.406  | 0.021 | 0.089  | 0.018 | 0.078              | 0.006 | 0.087                             | 0.610                 |
|                         | C22:6ω3  | 10.669 | 0.502 | 10.730 | 0.430 | 1.475  | 0.335 | 1.455              | 0.019 | 0.932                             | 0.955                 |
| <b>Saturated</b>        |          | 15.878 | 1.163 | 15.544 | 0.939 | 1.965  | 0.198 | 1.486              | 0.095 | 0.834                             | 0.095                 |
| <b>Mono-unsaturated</b> |          | 13.183 | 1.138 | 13.547 | 0.641 | 1.028  | 0.147 | 0.893              | 0.044 | 0.794                             | 0.428                 |
| <b>Poly-unsaturated</b> |          | 50.237 | 3.080 | 57.977 | 3.201 | 3.025  | 0.540 | 2.660              | 0.077 | 0.156                             | 0.540                 |
| <b>Total</b>            |          | 79.298 | 4.802 | 87.069 | 4.085 | 6.017  | 0.877 | 5.039              | 0.204 | 0.285                             | 0.338                 |

B

|                       |  | Brain  |       |        |       | Muscle |       |                     |       | Student test         |                       |
|-----------------------|--|--------|-------|--------|-------|--------|-------|---------------------|-------|----------------------|-----------------------|
|                       |  | Ctrl   |       | Spa-/- |       | Ctrl   |       | Spa-/-              |       | Brain Ctrl vs Spa-/- | Muscle Ctrl vs Spa-/- |
|                       |  | Mean   | SEM   | Mean   | SEM   | Mean   | SEM   | Mean                | SEM   |                      |                       |
| <b>Cholesterol</b>    |  | 56.844 | 4.746 | 60.343 | 1.579 | 2.303  | 0.227 | 1.725 <sup>#</sup>  | 0.080 | 0.523                | 0.074                 |
| Cho-C16               |  | nd     | nd    | nd     | nd    | 0.080  | 0.021 | 0.043               | 0.004 |                      | 0.159                 |
| Cho-C18               |  | nd     | nd    | nd     | nd    | 0.186  | 0.017 | 0.104*              | 0.003 |                      | 0.008                 |
| <b>Total Est Chol</b> |  | nd     | nd    | nd     | nd    | 0.266  | 0.013 | 0.147*              | 0.005 |                      | 0.001                 |
| C49-TG (14/16/16)     |  | nd     | nd    | nd     | nd    | 0.546  | 0.116 | 0.146*              | 0.049 |                      | 0.034                 |
| C51-TG (16/16/16)     |  | 0.368  | 0.028 | 0.446  | 0.207 | 3.193  | 0.574 | 1.012*              | 0.297 | 0.659                | 0.028                 |
| C53-TG (16/16/18)     |  | 1.756  | 0.118 | 1.607  | 0.823 | 9.452  | 1.869 | 3.667 <sup>#</sup>  | 0.993 | 0.867                | 0.052                 |
| C55-TG (16/18/18)     |  | 2.948  | 0.154 | 2.935  | 1.551 | 12.727 | 2.722 | 5.541 <sup>#</sup>  | 1.405 | 0.994                | 0.079                 |
| C57-TG (18/18/18)     |  | 2.106  | 0.111 | 2.294  | 1.202 | 7.780  | 1.787 | 3.441               | 0.812 | 0.884                | 0.092                 |
| C59-TG (18/18/20)     |  | 0.374  | 0.029 | 0.389  | 0.246 | 2.387  | 0.526 | 1.072               | 0.263 | 0.957                | 0.089                 |
| <b>Total TG</b>       |  | 7.553  | 0.435 | 7.522  | 4.012 | 36.085 | 7.461 | 14.878 <sup>#</sup> | 3.816 | 0.994                | 0.065                 |
| <b>Total NL</b>       |  | 64.397 | 4.316 | 67.865 | 2.573 | 38.654 | 7.683 | 16.751 <sup>#</sup> | 3.890 | 0.528                | 0.064                 |

C

|                  |                | Brain    |          |                    |          | Muscle  |        |                    |        | Student test         |                       |
|------------------|----------------|----------|----------|--------------------|----------|---------|--------|--------------------|--------|----------------------|-----------------------|
|                  |                | Ctrl     |          | Spa-/-             |          | Ctrl    |        | Spa-/-             |        | Brain Ctrl vs Spa-/- | Muscle Ctrl vs Spa-/- |
|                  |                | Mean     | SEM      | Mean               | SEM      | Mean    | SEM    | Mean               | SEM    |                      |                       |
| Cer              | Cer d18:1/16_0 | 3.311    | 0.235    | 2.267              | 0.484    | 0.760   | 0.231  | 0.561              | 0.075  | 0.124                | 0.458                 |
|                  | Cer d18:1/18:0 | 10.487   | 0.978    | 7.529*             | 0.248    | 0.038   | 0.007  | 0.024              | 0.003  | 0.043                | 0.133                 |
|                  | Cer d18:1/20:0 | 0.993    | 0.081    | 1.010              | 0.044    | 0.038   | 0.012  | 0.023              | 0.001  | 0.864                | 0.287                 |
|                  | Cer d18:1/22:0 | 9.119    | 1.064    | 10.240             | 0.249    | 0.129   | 0.011  | 0.068*             | 0.008  | 0.363                | 0.011                 |
|                  | Cer d18:1/24:0 | 20.896   | 2.185    | 20.810             | 1.073    | 0.663   | 0.096  | 0.418              | 0.040  | 0.973                | 0.078                 |
|                  | Cer d18:1/24:1 | 14.634   | 1.913    | 15.031             | 0.490    | 0.548   | 0.087  | 0.399              | 0.037  | 0.850                | 0.190                 |
|                  | Cer d18:1/26:0 | 1.739    | 0.119    | 1.788              | 0.207    | 0.093   | 0.016  | 0.052 <sup>#</sup> | 0.003  | 0.848                | 0.075                 |
|                  | Cer d18:1/26:1 | 2.084    | 0.121    | 2.092              | 0.292    | 0.113   | 0.019  | 0.061 <sup>#</sup> | 0.003  | 0.981                | 0.052                 |
| <b>Total Cer</b> |                | 63.263   | 6.132    | 60.767             | 1.473    | 2.382   | 0.373  | 1.607              | 0.154  | 0.712                | 0.128                 |
| PC               | PC28:0         | 0.467    | 0.094    | 0.539              | 0.054    | 0.073   | 0.012  | 0.061              | 0.002  | 0.544                | 0.394                 |
|                  | PC30:0         | 28.927   | 4.114    | 33.825             | 2.977    | 2.396   | 0.271  | 2.534              | 0.222  | 0.389                | 0.715                 |
|                  | PC30:1         | 2.606    | 0.216    | 3.359 <sup>#</sup> | 0.228    | 0.380   | 0.119  | 0.415              | 0.029  | 0.074                | 0.792                 |
|                  | PC32:0         | 797.964  | 103.598  | 1072.857           | 113.992  | 33.948  | 7.400  | 37.786             | 4.404  | 0.149                | 0.679                 |
|                  | PC32:1         | 138.487  | 34.894   | 194.801            | 35.386   | 5.851   | 1.340  | 5.806              | 0.545  | 0.320                | 0.977                 |
|                  | PC32:2         | 7.125    | 1.231    | 11.886             | 1.948    | 0.622   | 0.146  | 0.738              | 0.081  | 0.108                | 0.526                 |
|                  | PC34:0         | 302.382  | 60.189   | 443.347            | 78.403   | 10.780  | 2.033  | 12.720             | 1.025  | 0.227                | 0.442                 |
|                  | PC34:1         | 2257.603 | 515.734  | 3125.793           | 551.501  | 78.857  | 16.692 | 89.072             | 7.074  | 0.314                | 0.603                 |
|                  | PC34:2         | 170.364  | 44.014   | 280.255            | 52.777   | 38.984  | 8.709  | 54.449             | 2.589  | 0.185                | 0.164                 |
|                  | PC34:3         | 14.520   | 3.575    | 23.919             | 3.616    | 2.234   | 0.489  | 3.118              | 0.183  | 0.138                | 0.166                 |
|                  | PC36:1         | 680.319  | 135.087  | 1026.926           | 196.113  | 20.288  | 4.378  | 28.666             | 1.790  | 0.219                | 0.151                 |
|                  | PC36:2         | 174.682  | 41.550   | 289.778            | 62.017   | 12.306  | 2.711  | 15.994             | 1.018  | 0.198                | 0.272                 |
|                  | PC36:3         | 43.693   | 12.593   | 69.569             | 13.079   | 10.931  | 2.644  | 15.630             | 0.753  | 0.227                | 0.163                 |
|                  | PC36:4         | 42.139   | 10.646   | 58.045             | 6.525    | 10.396  | 2.419  | 15.049             | 1.082  | 0.272                | 0.154                 |
|                  | PC38:2         | 68.034   | 13.911   | 109.263            | 23.167   | 2.109   | 0.542  | 3.387              | 0.227  | 0.202                | 0.095                 |
|                  | PC38:3         | 21.483   | 5.544    | 32.935             | 5.504    | 2.736   | 0.698  | 4.177              | 0.243  | 0.213                | 0.123                 |
|                  | PC38:4         | 39.890   | 9.457    | 51.568             | 5.263    | 3.712   | 0.898  | 4.609              | 0.143  | 0.341                | 0.380                 |
|                  | PC38:5         | 174.018  | 42.580   | 233.986            | 36.994   | 18.262  | 4.014  | 24.053             | 2.104  | 0.348                | 0.270                 |
|                  | PC38:6         | 980.405  | 235.988  | 1371.361           | 240.577  | 73.954  | 15.794 | 103.834            | 13.526 | 0.311                | 0.224                 |
|                  | PC40:3         | 28.435   | 6.529    | 48.519             | 10.650   | 0.364   | 0.084  | 0.673 <sup>#</sup> | 0.089  | 0.183                | 0.065                 |
| PC40:6           | 407.301        | 72.280   | 529.827  | 56.646             | 18.207   | 3.774   | 25.875 | 2.459              | 0.253  | 0.164                |                       |
| <b>Total PC</b>  |                | 6380.842 | 1347.258 | 9012.356           | 1493.600 | 347.392 | 71.925 | 448.648            | 38.115 | 0.261                | 0.281                 |
| PE               | PE32:0         | 2.478    | 0.319    | 3.448 <sup>#</sup> | 0.252    | 0.093   | 0.012  | 0.086              | 0.008  | 0.075                | 0.619                 |
|                  | PE32:1         | 1.694    | 0.203    | 2.379              | 0.230    | 0.061   | 0.009  | 0.052              | 0.003  | 0.089                | 0.381                 |

|                 |                 |          |                     |                    |         |         |         |         |        |       |       |
|-----------------|-----------------|----------|---------------------|--------------------|---------|---------|---------|---------|--------|-------|-------|
| PE              | PE34:0          | 26.756   | 2.250               | 36.017*            | 2.406   | 1.163   | 0.116   | 1.048   | 0.063  | 0.048 | 0.434 |
|                 | PE34:1          | 5.980    | 0.857               | 8.543 <sup>#</sup> | 0.656   | 0.401   | 0.058   | 0.414   | 0.015  | 0.076 | 0.842 |
|                 | PE36:1          | 46.716   | 1.317               | 60.546*            | 2.776   | 3.082   | 0.540   | 3.078   | 0.145  | 0.011 | 0.996 |
|                 | PE36:2          | 14.488   | 1.305               | 20.884*            | 1.546   | 1.404   | 0.224   | 1.507   | 0.046  | 0.034 | 0.674 |
|                 | PE36:3          | 5.476    | 0.933               | 8.059              | 0.755   | 0.733   | 0.116   | 0.813   | 0.022  | 0.098 | 0.536 |
|                 | PE36:4          | 3.021    | 0.593               | 4.035              | 0.424   | 0.439   | 0.079   | 0.487   | 0.022  | 0.236 | 0.591 |
|                 | PE38:2          | 5.191    | 0.682               | 6.296              | 0.594   | 0.532   | 0.119   | 0.519   | 0.007  | 0.289 | 0.918 |
|                 | PE38:3          | 12.114   | 1.667               | 15.046             | 0.828   | 1.706   | 0.294   | 1.938   | 0.088  | 0.190 | 0.490 |
|                 | PE38:4          | 15.473   | 2.319               | 19.647             | 1.823   | 2.432   | 0.458   | 2.613   | 0.090  | 0.230 | 0.718 |
|                 | PE38:5          | 56.499   | 8.732               | 72.128             | 7.426   | 3.854   | 0.802   | 4.013   | 0.432  | 0.244 | 0.869 |
|                 | PE38:6          | 99.722   | 18.803              | 134.666            | 17.142  | 6.595   | 1.390   | 6.998   | 0.674  | 0.242 | 0.807 |
|                 | PE40:3          | 4.404    | 0.222               | 5.734*             | 0.380   | 0.411   | 0.090   | 0.450   | 0.024  | 0.039 | 0.703 |
|                 | PE40:5          | 402.640  | 64.147              | 525.824            | 41.413  | 28.268  | 6.446   | 37.517  | 2.730  | 0.182 | 0.257 |
|                 | PE40:6          | 213.375  | 28.221              | 278.489            | 23.704  | 18.616  | 4.787   | 23.464  | 1.686  | 0.152 | 0.393 |
| PE40:7          | 20.946          | 2.951    | 28.802 <sup>#</sup> | 1.122              | 6.515   | 2.091   | 7.885   | 0.086   | 0.068  | 0.548 |       |
| <b>Total PE</b> | 936.973         | 134.729  | 1230.544            | 101.329            | 76.304  | 17.399  | 92.883  | 5.510   | 0.157  | 0.415 |       |
| SM              | SM d18:1/14:0   | 13.848   | 2.932               | 18.324             | 0.369   | 5.705   | 1.548   | 5.758   | 0.991  | 0.204 | 0.978 |
|                 | SM d18:1/16:0   | 400.951  | 23.185              | 413.808            | 13.821  | 61.229  | 5.998   | 36.565* | 6.127  | 0.659 | 0.045 |
|                 | SM d18:1/16:1   | 0.000    | 0.000               | 0.000              | 0.000   | 0.700   | 0.153   | 0.801   | 0.146  |       | 0.658 |
|                 | SM d18:1/18:0   | 388.146  | 32.231              | 455.013            | 61.430  | 1.545   | 0.236   | 0.920   | 0.185  | 0.390 | 0.105 |
|                 | SM d18:1/18:1   | 0.000    | 0.000               | 0.000              | 0.000   | 0.437   | 0.120   | 0.393   | 0.082  |       | 0.780 |
|                 | SM d18:1/20:0   | 67.837   | 8.131               | 82.354             | 7.445   | 4.459   | 0.554   | 3.426   | 0.446  | 0.258 | 0.220 |
|                 | SM d18:1/20:1   | 2.283    | 2.283               | 5.070              | 2.549   | 0.859   | 0.299   | 0.766   | 0.151  | 0.461 | 0.796 |
|                 | SM d18:1/22:0   | 277.781  | 45.499              | 309.104            | 21.076  | 8.839   | 1.709   | 5.738   | 0.790  | 0.566 | 0.175 |
|                 | SM d18:1/22:1   | 76.723   | 14.225              | 96.609             | 8.134   | 13.783  | 3.693   | 13.800  | 2.403  | 0.292 | 0.997 |
|                 | SM d18:1/24:0   | 436.328  | 78.428              | 517.728            | 38.429  | 12.273  | 2.883   | 6.629   | 0.703  | 0.404 | 0.130 |
|                 | SM d18:1/24:1   | 908.975  | 139.843             | 1146.070           | 69.147  | 41.404  | 8.637   | 27.745  | 3.081  | 0.203 | 0.211 |
|                 | <b>Total SM</b> | 2572.872 | 340.273             | 3044.081           | 176.047 | 151.232 | 20.175  | 102.541 | 14.892 | 0.286 | 0.124 |
| PI              | PI34:1          | 8.480    | 0.978               | 9.152              | 0.299   | 0.892   | 0.133   | 0.692   | 0.044  | 0.547 | 0.226 |
|                 | PI34:2          | 5.085    | 2.585               | 7.175              | 0.800   | 0.818   | 0.112   | 0.717   | 0.026  | 0.483 | 0.430 |
|                 | PI36:1          | 13.379   | 2.246               | 15.342             | 1.004   | 2.895   | 0.213   | 3.346   | 0.434  | 0.470 | 0.403 |
|                 | PI36:2          | 20.269   | 4.272               | 24.730             | 1.343   | 6.517   | 0.690   | 7.215   | 0.739  | 0.376 | 0.528 |
|                 | PI36:3          | 21.572   | 1.151               | 24.759             | 1.870   | 4.173   | 0.539   | 3.924   | 0.457  | 0.220 | 0.743 |
|                 | PI38:1          | 1.455    | 1.455               | 0.000              | 0.000   | 0.000   | 0.000   | 0.000   | 0.000  | 0.374 |       |
|                 | PI38:2          | 16.968   | 0.410               | 20.483*            | 0.712   | 2.387   | 0.311   | 1.949   | 0.207  | 0.013 | 0.306 |
|                 | PI38:3          | 168.473  | 15.334              | 152.943            | 1.708   | 32.138  | 4.457   | 27.760  | 2.626  | 0.371 | 0.445 |
|                 | PI38:4          | 421.773  | 13.295              | 398.324            | 14.058  | 84.220  | 10.807  | 79.319  | 1.633  | 0.292 | 0.677 |
|                 | PI38:5          | 277.248  | 8.893               | 255.669            | 15.066  | 56.148  | 6.137   | 49.441  | 3.433  | 0.285 | 0.394 |
|                 | PI40:3          | 0.386    | 0.386               | 0.000              | 0.000   | 0.000   | 0.000   | 0.000   | 0.000  | 0.374 |       |
|                 | PI40:4          | 21.565   | 2.154               | 21.561             | 0.542   | 5.897   | 0.998   | 5.540   | 0.079  | 0.999 | 0.739 |
|                 | PI40:5          | 104.222  | 9.297               | 105.964            | 6.880   | 28.680  | 5.823   | 29.190  | 1.204  | 0.888 | 0.936 |
|                 | PI40:6          | 217.425  | 24.378              | 209.865            | 19.240  | 50.320  | 10.304  | 49.004  | 2.788  | 0.820 | 0.908 |
| <b>Total PI</b> | 1298.301        | 68.772   | 1245.966            | 52.456             | 275.087 | 39.650  | 258.097 | 11.896  | 0.578  | 0.703 |       |
