# Supplementary material for: Spastin mutations impair coordination between lipid droplet dispersion and reticulum
Source: PubMed Central journal article supplement (PMC7173978; doi:10.1371/journal.pgen.1008665), 2020-04-21
Supplement: pgen.1008665.s006.pdf [file pgen.1008665.s006.pdf]

Table S2: List of Primers

| Method                | Gene      |           |            | Name                      |                                                   | sequence 5' -> 3'                                      |
|-----------------------|-----------|-----------|------------|---------------------------|---------------------------------------------------|--------------------------------------------------------|
|                       | Name      | Species   | Accession# |                           |                                                   |                                                        |
| Cloning               | Spastin   | zebrafish | Q6NW58     | ATTB1-zSpastin M61 For    | For                                               | ggggacaagttgtacaaaaagcaggcttcATGGCGGCCCGGCCAAAGAGTG    |
|                       |           |           |            | ATTB1-zSpastin M1 - For   | For                                               | ggggacaagttgtacaaaaagcaggcttcATGAATTCTGGGCACAAAGCGA    |
|                       |           |           |            | ATTB2-zSpastin Rev        | Rev                                               | ggggaccactttgtacaagaaagctgggtTACGCCAGTCGTGTCTCCGTAC    |
|                       | Spastin   | human     | Q9UBP0     | ATTB1 Spastin M87 For     | For                                               | ggggacaagttgtacaaaaagcaggcttcATGGCAGCCAAGAGGAGCTCCGG   |
|                       |           |           |            | ATTB1-hSpastin M1 For     | For                                               | ggggacaagttgtacaaaaagcaggcttcATGAATTCTCCGGGTGGACGAG    |
|                       |           |           |            | ATTB2-hSpastin M1 Rev     | Rev                                               | ggggaccactttgtacaagaaagctgggtTTAAACAGTGGTATCTCCAAAG    |
|                       | Seipin    | human     | Q96G97     | ATTB1 Seipin $\alpha$ For | For                                               | ggggacaagttgtacaaaaagcaggcttcATGGTCAACGACCCTCCAGTAC    |
|                       |           |           |            | ATTB1 Seipin $\beta$ For  | For                                               | ggggacaagttgtacaaaaagcaggcttcATGTCTACAGAAAAGGTAGACC    |
|                       |           |           |            | ATTB2 Seipin Rev          | Rev                                               | ggggaccactttgtacaagaaagctgggtGGAAC TAGAGCAGGTGGGGCCG   |
|                       | REEP1     | human     | Q9H902     | ATTB1-REEP1 For           | For                                               | ggggacaagttgtacaaaaagcaggcttcATGGTGTCTGATGGATCATCTCCAG |
|                       |           |           |            | ATTB2-REEP1 Rev           | Rev                                               | ggggaccactttgtacaagaaagctgggtGGCGGTGCTGAGCTGCTAGCGC    |
|                       | Atlastin1 | human     | Q8WXF7     | ATTB1-Atlastin1 For       | For                                               | ggggacaagttgtacaaaaagcaggcttcATGGCCAAGAACCGAGGGACAG    |
|                       |           |           |            | ATTB2-Atlastin1 Rev       | Rev                                               | ggggaccactttgtacaagaaagctgggtCATTITTTCTTTCTGATTGTTCCAG |
|                       | Spartin   | human     | Q8N0X7     | ATTB1-hSpartin For        | For                                               | ggggacaagttgtacaaaaagcaggcttcATGGAGCAAGGCCACAAATGG     |
| ATTB2-hSpartin Rev    |           |           |            | Rev                       | ggggaccactttgtacaagaaagctgggtTTTTATCTTTCTTTTGCTCC |                                                        |
| qPCR                  | 18s       | zebrafish | KY486501   | 18s-F                     | For                                               | AGCGTGCGGGAAACCACGAG                                   |
|                       |           |           |            | 18s-R                     | Rev                                               | AAGCCG CAGGCTCCACTCCT                                  |
|                       | Seipin    | zebrafish | E7EYM9     | Seipin-F                  | For                                               | TCAGCAGAGACGAGAAGAAGCA                                 |
|                       |           |           |            | Seipin-R                  | Rev                                               | GAAGCGGATCTGAGAGTAGTTCACT                              |
|                       | Atlastin1 | zebrafish | B8A6H1     | Atlastin1-F               | For                                               | CAGAGAGGTGGTGGCCATTT                                   |
|                       |           |           |            | Atlastin1-R               | Rev                                               | TTCCTGCGCTGGCTGTACA                                    |
|                       | REEP1     | zebrafish | E7F615     | REEP1-F                   | For                                               | TTGTGCTGGCTCCCATTCTAC                                  |
|                       |           |           |            | REEP1-R                   | Rev                                               | ATACAGCAGACTGGATCCCTTTG                                |
|                       | SpartinB  | zebrafish | A0A0R4ITC8 | Spartin-F                 | For                                               | CCAAGTAAACAAAAGCCTTCAT                                 |
|                       |           |           |            | Spartin1-R                | Rev                                               | ACGTCCAACATGTCCAGCAA                                   |
| rt PCR                | Spastin   | zebrafish | Q6NW58     | Spastin M1 For            | For                                               | ATGAATTCTGGGCACAAAGCGAG                                |
|                       |           |           |            | Spastin M61 For           | For                                               | ATGGCGGCCCGGCCAAAGAGTG                                 |
|                       |           |           |            | Spastin Rev               | Rev                                               | TACGCCAGTCGTGTCTCCGTACT                                |
|                       |           |           |            | Spastin Ex3 For           | For                                               | GAAGGCAGACAGAGCCAGAAAA                                 |
|                       |           |           |            | Spastin Ex5 rev           | Rev                                               | TGATTGTTTTGAGGGCCGGTCC                                 |
|                       | XBP1      | zebrafish | A7MC16     | xbp1-P5                   | For                                               | CGAGACAAGACGAGTGATCTGCT                                |
|                       |           |           |            | xbp1-P2                   | Rev                                               | GCAGGAGATCAGACTCAGAGTCTG                               |
|                       | GAPDH     | zebrafish | Q5XJ10     | GAPDH For                 | For                                               | ACTTTGTCATCGTTGAAGGT                                   |
| GAPDH Rev             |           |           |            | Rev                       | TGTCAGATCCACAACAGAGA                              |                                                        |
| in situ hybridization | Spastin   | zebrafish | Q6NW58     | ISH T7 Spastin Fw Sense   | For                                               | gaaataatacactcactatagggATGAATTCTGGGCACAAAGCG           |
|                       |           |           |            | ISH T7 Spastin Rw Anti-S  | Rev                                               | gaaataatacactcactatagggCTGGAGACTGTGAAAGCAGAT           |
|                       |           |           |            | ISH Spastin Fw Anti-S     | For                                               | ATGAATTCTGGGCACAAAGCG                                  |
|                       |           |           |            | ISH Spastin Rw Sense      | Rev                                               | CTGGAGACTGTGAAAGCAGAT                                  |

Cloning: Lower cases correspond to ATTB1/2 flanking sequences

ISH: Lower cases correspond to T7 promotor
